# Why Are CD8 T Cell Epitopes of Human Influenza A Virus Conserved?

Zheng-Rong Tiger Li<sup>a,b</sup>, Veronika I. Zarnitsyna<sup>b#</sup>, Anice C. Lowen<sup>b</sup>, Daniel Weissman<sup>a,c</sup>, Katia Koelle<sup>a</sup>, Jacob E. Kohlmeier<sup>b</sup>, Rustom Antia<sup>a#</sup>.

<sup>a</sup>Department of Biology, Emory University, Atlanta, Georgia, USA.

<sup>b</sup>Department of Microbiology and Immunology, Emory University School of Medicine, Atlanta, Georgia, USA.

<sup>c</sup>Department of Physics, Emory University, Atlanta, Georgia, USA.

Running Head: Conservation of Influenza CD8 T Cell Epitopes

#Address correspondence to Rustom Antia ([rantia@emory.edu](mailto:rantia@emory.edu)) or Veronika I. Zarnitsyna ([veronika.i.zarnitsyna@emory.edu](mailto:veronika.i.zarnitsyna@emory.edu))

## Abstract

The high-degree conservation of CD8 T cell epitopes of influenza A virus (IAV) may allow T cell-inducing vaccines effective across different strains and subtypes. This conservation is not fully explained by functional constraint, since additional mutation(s) can compensate the replicative fitness loss of IAV escape-variant. Here, we propose three additional mechanisms that contribute to the conservation of CD8 T cell epitopes of IAV. First, influenza-specific CD8 T cells may protect predominantly against severe pathology rather than infection and may only have a modest effect on transmission. Second, polymorphism of human MHC-I gene restricts the advantage of an escape-variant to only a small fraction of human population, who carry the relevant MHC-I alleles. Finally, infection with CD8 T cell-escape-variants may result in compensatory increase in the responses to other epitopes of IAV. A combination of population genetics and epidemiological models is used to examine how the interplay between these mechanisms affects the rate of invasion of IAV escape-variants. We conclude that the invasion of an escape-variant will be very slow with a timescale of decades or longer, even if the escape-variant does not have a replicative fitness loss. Our results suggest T cell-inducing vaccines may not engender the rapid evolution of IAV and serve as a foundation for future modeling works on the long-term effectiveness and impacts of T cell-inducing influenza vaccines. (Word count: 221)

**Importance.** Universal influenza vaccines against the conserved epitopes of influenza A virus have been proposed to minimize the burden of seasonal outbreaks and prepare for the pandemics. However, it is not clear to which extent the T cell-inducing vaccines will select for viruses that escape the T cell responses. Our mathematical models suggest how the nature of CD8 T cell protection contributes to the conservation of the CD8 T cell epitopes of influenza A virus. Also, it points out the essential biological parameters and questions

38 that need addressing by future experimental works. (Word count: 91)

39

## 40 1 Introduction

41 Seasonal influenza is a major public health concern, causing about 410,000 deaths worldwide  
42 annually (1). The inactivated vaccine currently in use requires an antigenic match between  
43 the vaccine and circulating strains, so that the vaccine-induced antibodies can block viral  
44 entry and exit by binding to the antigenic sites, or epitopes. Most of the antibody epitopes  
45 reside on hemagglutinin (HA) and neuraminidase (NA), both of which vary largely across  
46 strains and subtypes of influenza A virus (IAV). Antibodies induced by exposure to earlier  
47 IAV strains drive the selection of antibody-escaping mutants (2). These new drifted strains  
48 of the virus are responsible for seasonal outbreaks of influenza. In addition to gradual  
49 changes caused by antigenic drift, larger antigenic shifts may occur when new antigenic  
50 subtypes (e.g., H1, H3, H5, H7) emerge from zoonotic reservoirs into the human popula-  
51 tion. Both antigenic drift and antigenic shift necessitate frequent updating of the influenza  
52 vaccine. New approaches that focus on antibodies against the conserved regions of HA or  
53 CD8 T cells specific to the conserved epitopes on interior proteins have been proposed for  
54 the development of vaccines that have broad efficacy and ideally confer 'universal' protec-  
55 tion against all IAV subtypes (3, 4, 5). Whether IAV is likely to evolve and escape the  
56 vaccine-induced CD8 T cell immunity is an essential question for the development of 'uni-  
57 versal' CD8 T cell-inducing vaccines. Therefore, in this paper, we investigate the reasons  
58 why CD8 T cell epitopes of IAV are so conserved.

59 CD8 T cells detect and kill virus infected cells by recognizing short viral protein-derived  
60 peptides (epitopes) bound to major histocompatibility complex class I proteins (MHC-I)  
61 on cell surface. While CD8 T cells are not considered to generate 'sterile immunity' that  
62 prevents infection, they can reduce the severity of disease and potentially viral transmission  
63 (6, 7). In addition, they may provide broad protection since CD8 T cell epitopes of influenza  
64 virus are largely conserved among drifted strains within one subtype and across different  
65 subtypes (7, 8, 9). The conservation of CD8 T cell epitopes is consistent with the observation  
66 that internal viral proteins (such as nucleoprotein (NP) and matrix-1 protein (M1)), which  
67 harbor the majority of CD8 T cell epitopes, have a much lower substitution rate than  
68 HA and NA, which are the targets of antibody responses (10). Also, within NP and M1,  
69 the epitope regions have less sites of  $dN/dS > 1$  compared to the non-epitope regions (11).  
70 Unlike the highly variable antibody epitopes, to date only 6 out of 64 CD8 T cell epitopes in  
71 human IAV have been found to have mutations that allow escape from CD8 T cell responses  
72 (9, 12).

73 Why are CD8 T cell epitopes of human influenza virus conserved? The functional con-  
74 straint hypothesis proposes that CD8 T cell epitopes are on the protein regions that do not  
75 tolerate changes in the amino acid sequence (13, 14). In this hypothesis, non-synonymous  
76 mutations in the epitope region totally or partially diminish protein function and result in  
77 viruses that incur a cost at the level of replication. In support of this, several studies have  
78 revealed that a single amino acid change at some residues within the NP or M1 can reduce  
79 the replication of the virus (13). A more recent study has shown that epistatic interactions  
80 may stabilize mutations and permit previously inaccessible destabilizing mutations (15).  
81 While the epistatic interactions greatly ameliorate the fitness cost, it would slow the rate  
82 at which a competitive mutant is generated. In addition, at least two other factors may

83 contribute to the conservation of CD8 T cell epitopes. First, while CD8 T cells protect the  
 84 hosts from severe pathology, they might not greatly reduce virus transmission from an in-  
 85 fected individual to new hosts; namely, the viruses are under no or little selection pressure.  
 86 Second, a mutant that has one or more mutated CD8 T cell epitopes may have selective  
 87 advantage only in the hosts whose MHC-I present the wild-type form of CD8 T cell epitope;  
 88 thus, polymorphism of MHC-I genes limits the selective advantage of a mutant in a fraction  
 89 of host population. In this paper, we use simple mathematical models to explore how the  
 90 interplay between above-mentioned factors affects the rate of invasion of a mutant, which  
 91 has a mutated epitope that is not detected by CD8 T cells specific for the wild-type epitope.  
 92 For brevity, the two virus populations are denoted by wild type (WT) and escape-variant  
 93 or mutant (MT).

## 94 2 Models and Results

95 As mentioned in the [Introduction](#), there are (at least) three factors that can affect the  
 96 fitness of an escape-variant: (i) The fitness cost of the mutation; (ii) the extent of selection  
 97 for the escape-variant in hosts carrying the *relevant* MHC-I allele(s) (i.e. one that presents  
 98 the wild-type form of CD8 T cell epitope); (iii) the frequency of hosts with the relevant  
 99 MHC-I allele(s) in the population. We begin with a relatively simple population genetics  
 100 model that allows us to examine how the interplay between these factors affects the rate of  
 101 invasion of an escape-variant. This model assumes the selective advantage for the escape-  
 102 variant in a host with a given set of MHC-I alleles is fixed. We then consider why this  
 103 assumption may not hold and examine the consequences of relaxing this assumption, using  
 104 an epidemiological model for the spread of wild type and escape-variant.

### 105 2.1 Population genetics model

106 Let us consider the wild type (WT) and one escape-variant (MT). Let  $h$  represent the set  
 107 of MHC-I allele(s) that present the focal epitope of WT but not MT, and let  $f$  equal the  
 108 frequency of  $h$ . The MHC-I alleles that present epitopes other than the focal one,  $H$ , are at  
 109 frequency  $(1 - f)$ . With the usual assumptions for Hardy-Weinberg equilibrium, we have

|                        | Host genotypes |              |             |
|------------------------|----------------|--------------|-------------|
|                        | $HH$           | $Hh$         | $hh$        |
| Genotype frequency     | $(1 - f)^2$    | $2f(1 - f)$  | $f^2$       |
| Relative fitness of WT | 1              | 1            | 1           |
| Relative fitness of MT | $1 - m$        | $1 - m + Rs$ | $1 - m + s$ |

111 where  $m$ ,  $s$ ,  $R$  denote the fitness cost of MT in all hosts, the selective advantage of MT in  
 112 hosts of  $hh$  genotype, and the dominance coefficient of the  $h$  allele, respectively. Here we  
 113 have assumed that the WT is equally fit in all genotypes, i.e., while  $h$  alleles present the  
 114 focal epitope, the  $H$  alleles present other epitopes that the virus also carries, so that all  
 115 alleles confer about the same level of resistance. This is not true for the MT: while the  $H$   
 116 alleles still successfully target its other epitopes,  $h$  does not recognize its focal epitope. The  
 117 frequency of the MT in generation  $t$ ,  $q_t$ , is given by

$$q_t = \frac{q_{t-1}K}{1 - q_{t-1} + q_{t-1}K} \quad (1)$$

118 where  $K = (1 - f)^2(1 - m) + 2f(1 - f)(1 - m + Rs) + f^2(1 - m + s)$  is the mean fitness of  
119 MT in the host population.

120 Equation 1 allows us to examine how the rate of invasion of the MT depends on:  $m$ ,  
121 the fitness cost;  $f$ , the frequency of  $h$ ;  $s$ , the selective advantage MT accrues in the hosts  
122 carrying  $h$ ; and  $R$ , the heterozygous effect. We first set  $R = 0$  on the biological ground that  
123 MHC-associated resistance to infections (and susceptibility to autoimmunity) is dominant  
124 (16, 17). In Appendix we consider the effect of relaxing this assumption.

125 In Figure 1, we plot how the rate of invasion depends on the the selective advantage  $s$   
126 of the MT ( $x$ -axis) and the frequency  $f$  of the MHC-I alleles in which MT has a selective  
127 advantage ( $y$ -axis). The rate of invasion is plotted on a log scale – it shows the  $\log_{10}$  of  
128 the number of generations required for the MT to go from a prevalence of 0.01% to 50% in  
129 the host population. Given that the serial interval for influenza is about 3 to 4 days (18),  
130 100-generation corresponds to about one year. In Panel A, we set the fitness cost to 1%  
131 (i.e.  $m = 0.01$ ). There is a parameter regime (white region with low  $s$  and  $f$ ) where the  
132 fitness cost is sufficient to prevent MT from invasion. When MT can invade, we see faster  
133 invasion when  $s$  or  $f$  increase.

#### 134 **Parameter $m$ .**

135 We show the effect of changing the fitness cost of MT ( $m$ ) from 0 to 10% in Figure 1B. We  
136 see that even if the escape-variant does not have any fitness cost (i.e.,  $m = 0$ ), it invades  
137 relatively slowly when  $s$  and  $f$  are small (the region to the bottom left of the leftmost panel  
138 of Figure 1B). See Appendix for more details.

#### 139 **Parameter $s$ .**

140 Building on the earlier ideas proposed by Halloran et al. (19), immunity can provide  
141 protection by reducing susceptibility of immune individuals to infection ( $IE_S$ ), as well as  
142 by reducing pathology ( $IE_P$ ) and transmission ( $IE_I$ ) in infected individuals. While the role  
143 of CD8 T cells in providing protection against influenza remains to be fully understood,  
144 a number of studies suggest that they play a significant role in reducing pathology (high  
145  $IE_P$ ). In humans, higher CD8 T cell responses prior to heterosubtypic virus infection are  
146 associated with faster viral clearance (6) and fewer symptoms (7). In support of human  
147 studies, mouse experiments have shown the cellular immunity induced by H1N1 and/or  
148 H3N2 is able to protect the hosts from lethal infection with avian H5N1 or H7N9 (20,  
149 21, 22). CD8 T cells are likely to be less effective in preventing infection (very low  $IE_S$ ),  
150 although they may reduce the viral load during infection (modest  $IE_I$ ). Consequently, the  
151 selection pressure on a virus imposed by *all* CD8 T cell responses,  $1 - (1 - IE_S)(1 - IE_I)$ ,  
152 will be relatively low. Furthermore, since a virus has multiple CD8 T cell epitopes, the  
153 selective advantage of a variant that escapes CD8 T cell responses to a single epitope would  
154 be considerably smaller (See Appendix for details).

155 In conclusion, although CD8 T cells may provide some protection against severe pathol-  
156 ogy, escape-variants having a mutated CD8 T cell epitope are unlikely to have much selective  
157 advantage, even in the hosts with the relevant MHC-I that presents the wild-type epitope.  
158 In other words, we expect  $s$  to be small.

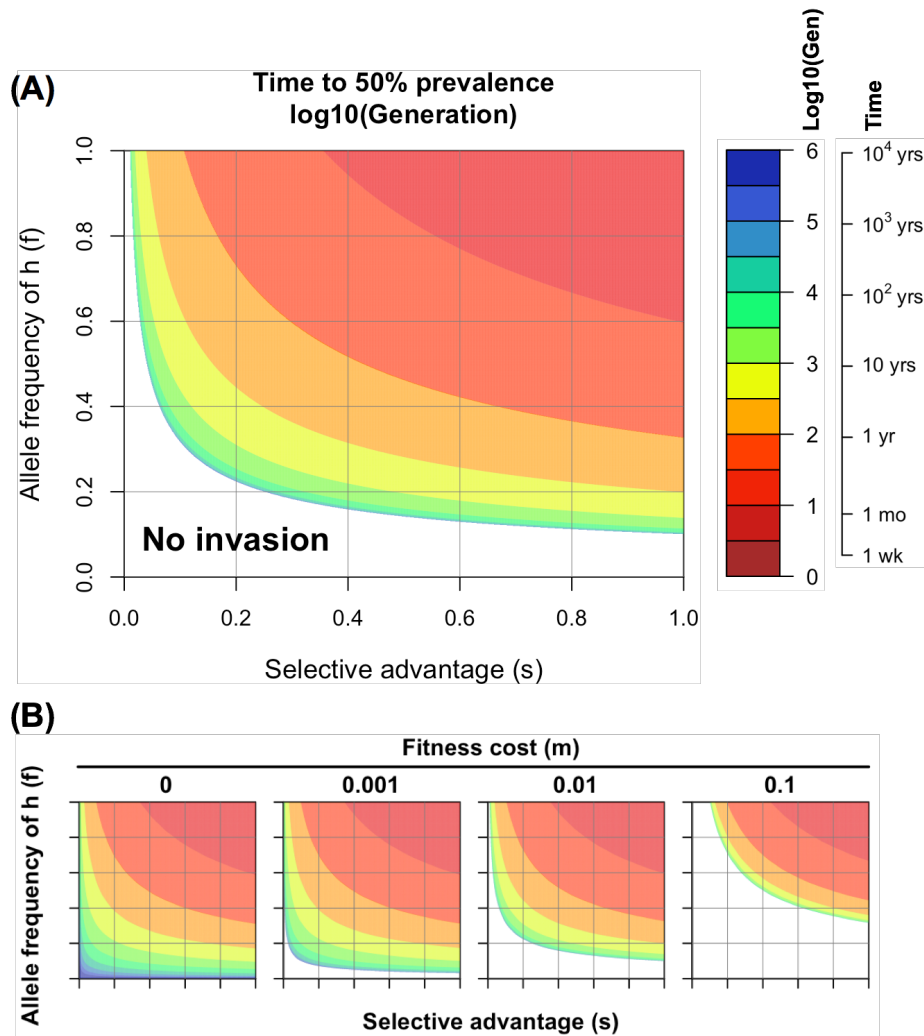

Figure 1: Rate of invasion of a CD8 T cell escape-variant. (A) Contour plots show the number of generations on a log scale required for the escape-variant to increase from 0.01 to 50% prevalence predicted by Equation 1. The approximate time for this to occur is calculated by assuming a serial interval of 3-4 days between infections (i.e. that there are about 100 generations per year). Fitness cost is set to 1% (i.e.,  $m = 0.01$ ). (B) We show the time for invasion under different fitness costs, which goes from 0 to 10%. We see that even when the mutant does not have a fitness cost ( $m = 0$ ), it will invade relatively slowly if  $s$  and  $f$  are small due to the nature of T cell protection and extent of MHC polymorphism. Ticks on the axes in (B) indicate the same numbers as in (A).

159 **Parameter  $f$ .**

160 Escape-variants will only accrue an advantage in individuals of  $hh$  genotype. For example,  
 161 the R384G escaping mutation on the NP<sub>383-391</sub> epitope is advantageous in the hosts who

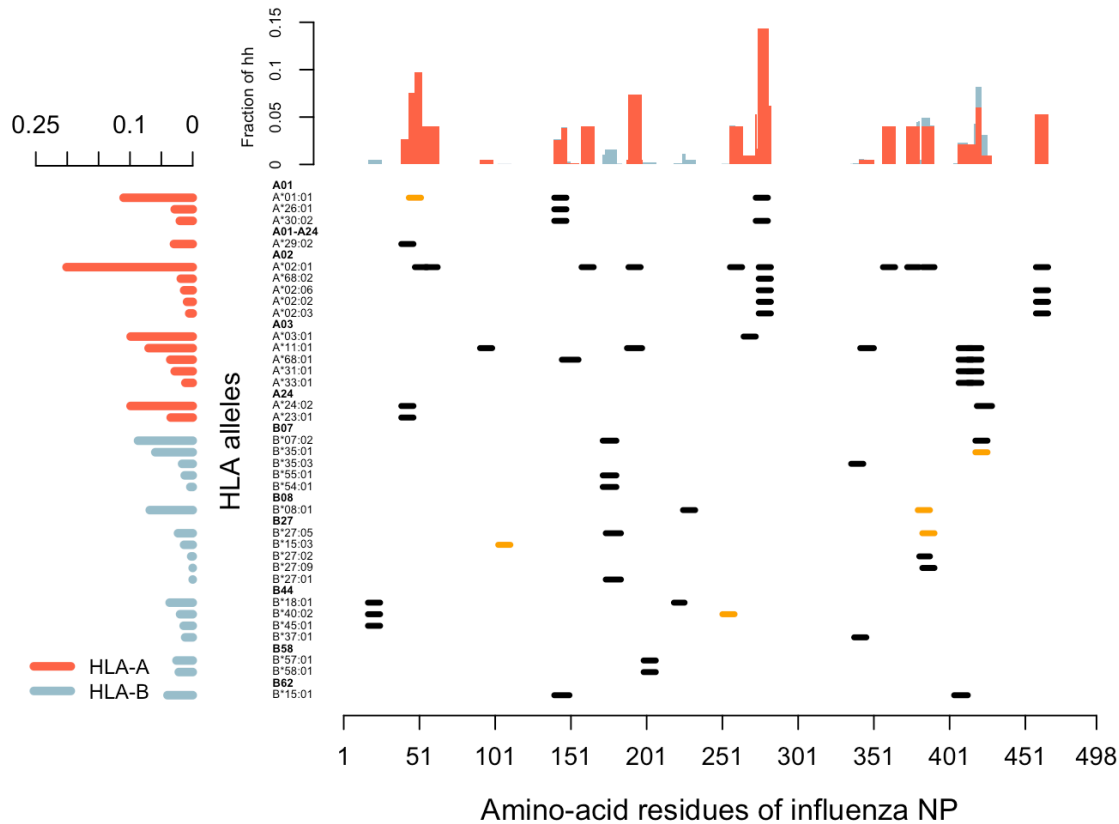

Figure 2: Distribution of CD8 T cell epitopes derived from the nucleoprotein of human IAV. In the main panel, each segment represents one unique CD8 T cell epitope derived from nucleoprotein of human IAV, aligned with its relevant HLA allele. Epitopes that have empirically verified escape-mutants reported are labeled in orange. The bar graph in left panel shows the weighted average frequency of the alleles, which are grouped into 11 supertypes (highlighted in boldface). The bar graph in the top panel shows the fraction of the population in which the virus with a mutation in the corresponding amino acid has a selective advantage.

162 carry B\*08:01 and/or B\*27:05 but not in those who carry other alleles. In Figure 2, we  
 163 show the distribution of experimentally-verified CD8 T cell epitopes derived from the nu-  
 164 cleoprotein of human IAV retrieved from the Immune Epitope Database. It is clear that  
 165 no single epitope is presented by all human leucocyte antigen (HLA, the human version of  
 166 MHC) alleles, nor is there a single HLA allele presenting all epitopes. With this information  
 167 and the frequencies of HLA alleles based on the National Marrow Donor Program (NMDP)  
 168 dataset, we estimated the fraction of host population where the mutation at each amino  
 169 acid residue would confer a selective advantage (top panel of Figure 2) (see Appendix for  
 170 details). Typically, mutations confer selective advantage to the virus in only a small fraction  
 171 (less than 10%) of host population.

## 172 Integrating parameters $s$ , $f$ , and $m$ .

173 As mentioned in the Introduction, epistatic interactions allow the virus to potentially gener-  
 174 ate escape-variants to a given CD8 T cell epitope without engendering a substantial fitness

175 cost. Our results show that, since  $s$  and  $f$  are small, these escape-variants will spread  
176 very slowly in the host population. For example, when  $f = 0.1$  (i.e. the escape-variant  
177 has an advantage in about 1% of the infections, who are of  $hh$  genotype ( $f^2 = 0.01$ )), an  
178 escape-variant would spend 50 to 100 years reaching 50% prevalence, even if its fitness is  
179 20% more than the wild type (i.e.  $s = 0.2$ ) in the hosts with relevant HLA and no fitness  
180 cost is accompanied (i.e.,  $m = 0$ ).

181 In conclusion, even if mutations that allow the virus to escape CD8 T cells specific for  
182 a given epitope have little or no fitness cost, escape-variants will only increase in frequency  
183 very slowly.

## 184 2.2 Epidemiological models.

### 185 Compensatory immunity reduces the selective advantage of mutants over time.

186 The population genetics framework described above assumes that the fitness of an escape-  
187 variant virus depends on host genotype and does not change over time. In particular,  
188 we assume that the fitness of escape-variant (MT) relative to the wild-type (WT) equals  
189  $(1 - m + s)$  in the hosts of the  $hh$  genotype and  $(1 - m)$  in the hosts of other genotypes ( $HH$   
190 and  $Hh$ ). However, in a host of  $hh$  genotype who has been infected by MT, recovered, and  
191 moved to the susceptible category (due to antigenic drift), we might expect the selective  
192 advantage ( $s$ ) of MT to decrease. This decline in  $s$  could arise for at least two biological  
193 reasons. First, the mutated epitope is still presented by the MHC-I; the mutation simply  
194 changes the configuration of the epitope recognized by the CD8 T-cell receptor (12). In this  
195 case, the mutant epitope may induce a new set of CD8 T cells. Second, the lack of CD8  
196 T cell response to one epitope could result in compensatory increases in responses to other  
197 epitopes.

198 We show the fitness of WT or MT infections in the hosts of different genotypes in  
199 Figure 3. In hosts of  $HH$  and  $Hh$ , the fitnesses of WT and MT are 1 and  $(1 - m)$ , the  
200 same as in population genetics model. The fitness of MT in hosts of  $hh$  that are infected  
201 with MT for the first time is  $(1 - m + s)$  as described earlier. After these hosts recover  
202 and regain susceptibility due to antigenic drift, the fitness of MT following reinfection with  
203 MT becomes  $(1 - m + s(1 - c))$ , where  $c$  denotes the extent of compensatory CD8 T cell  
204 responses. Parameter  $c$  ranges from 0 to 1, with 0 corresponding to no compensatory  
205 increase in responses to other epitopes and 1 corresponding to full compensation. The  
206 range for the fitness of MT in hosts of  $hh$  with prior infections with MT is shown by the  
207 shaded region in Figure 3A.

### 208 Epidemiology of infections with wild-type and escape-variant viruses.

209 We use a simple epidemiological model to describe the changes in frequencies of susceptible  
210 ( $S$ ), infected ( $W$  and  $M$  for WT and MT infections) and immune ( $R$ ) hosts. The subscript  
211 to  $S$ ,  $W$ ,  $M$ , and  $R$  populations indicates the viruses these hosts have been exposed to in  
212 the past. Individuals can be infected multiple times during their lifetime due to antigenic  
213 drift at antibody epitopes (23). We incorporate this by letting individuals move from the  
214 immune ( $R$ ) to susceptible ( $S$ ) compartments at rate  $\omega$  (24).

215 We consider the epidemiology of WT infections in individuals of different genotypes,  
216 where the right section of Figure 3B is hosts of  $hh$  genotype and the left section is hosts  
217 of  $HH$  and  $Hh$  genotypes. Prior to the introduction of MT, we assume that the WT is  
218 circulating and hosts have CD8 T cell immunity to the wild-type epitope. Due to antigenic

219 drift, individuals typically get reinfected with a drifted strain every 5-10 years (23), and we  
220 choose the rate of loss of immunity corresponding to this duration ( $\omega = 5 \times 10^{-4}/\text{day} \approx$   
221  $5.5/\text{year}$ ). We begin the simulations with WT infections at equilibrium.

222 Now, on the introduction of MT, the MT has fitness  $(1 - m)$  or  $(1 - m + s)$  in the  
223 MT-infected hosts of the  $HH/Hh$  or  $hh$  genotypes, respectively. MT-infected individuals  
224 move to the immune category with a subscript of  $WM$  (e.g.  $R_{WM}$ ). Individuals in  $R_{WM}$   
225 become susceptible due to antigenic drift in the virus and move to  $S_{WM}$ . When individuals  
226 in  $S_{WM}$  are infected with the WT, they move to  $W_{WM}$  and the WT has fitness 1, while  
227 when individuals in  $S_{WM}$  are infected with the MT, they move to the  $M_{WM}$  and the MT  
228 has fitness  $(1 - m + s(1 - c))$ . For simplicity, we incorporate the fitness in the transmissibility  
229 parameter ( $\beta$ ). Equations are shown in the Appendix.

230 In Figure 4, we explore how the escape-variant (MT) spreads through the host popu-  
231 lation following its introduction. In particular, we focus on how compensatory immunity  
232 changes the outcomes predicted by the population genetics models. In Panel 4A, we chose  
233 a simple scenario where the MT has a very small fitness cost ( $m = 0.001$ ), a 5% selective  
234 advantage ( $s = 0.05$ ) in 10% of the population ( $f^2 = 0.1$ ), and compensatory immunity  
235 reduces the selective advantage by 90% ( $c = 0.9$ ). In this scenario, we see that the MT  
236 now only transiently invades, and compensation in host immunity causes the frequency of  
237 MT to decline as the population-level immunity against the MT increases. In Panel 4B,  
238 we explore the consequences of changing the extent of compensation ( $c$ ). We see that the  
239 initial rate of invasion is very similar to what is predicted by the population genetics model.  
240 However, once the MT has spread through the population, the outcome depends strongly  
241 on the extent of compensatory immunity described by the parameter  $c$ . If  $c$  is small, then  
242 the MT goes to fixation in a manner similar to that of the population genetics model. If  $c$   
243 exceeds a threshold value  $c^*$  given by

$$c^* = 1 - \frac{m}{sf^2} \quad (2)$$

244 then the MT only transiently invades but declines to extinction in the long run. The  
245 competitive exclusion between WT and MT infections is shown in Panel 4C, where we plot  
246 how the outcome depends on  $s$ ,  $f$ , and  $c$ . Incorporating fitness parameters into the duration  
247 of infection gives similar results (results not shown).

248 In summary, the results of the epidemiological models show that the initial rate of  
249 invasion of the escape-variant is similar to that in the population genetics model described  
250 by Equation 1. However, at later time points, compensatory immunity reduces the rate of  
251 invasion. If the extent of CD8 T cell immunity to the escape-variant is sufficiently high,  
252 the outcome may even reversed if the overall selective advantage does not surmount fitness  
253 cost.



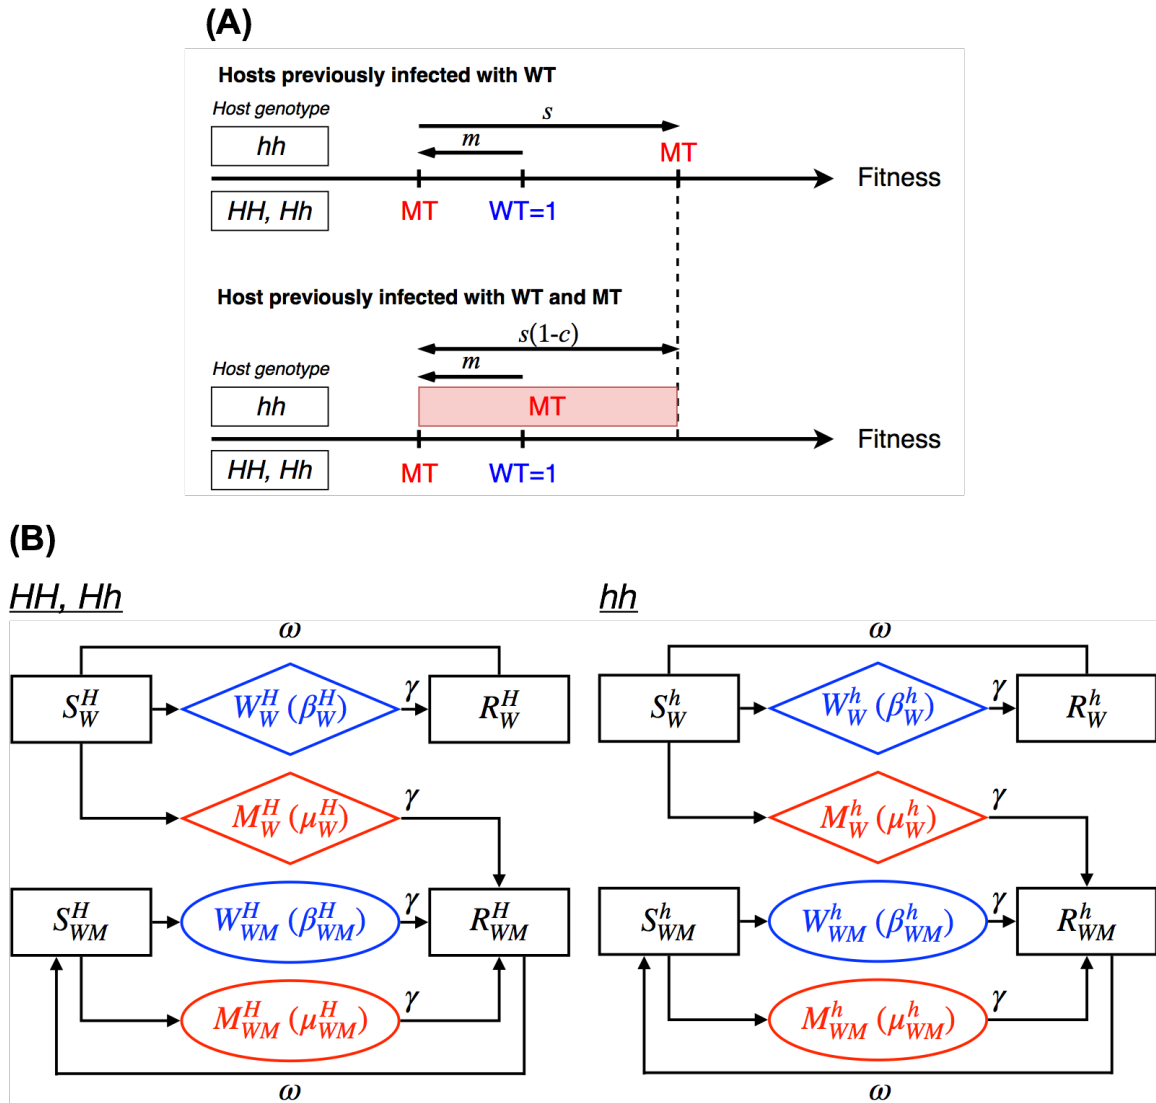

Figure 3: (A) Compensatory immunity alters the fitness of escape-variant infection in the  $hh$  individuals. We show the viral fitness in the hosts of different genotypes and infection histories, when they are infected with the wild type (WT) or escape-mutant (MT). The WT is shown in blue and MT in red. The fitness of WT infections is 1 in all hosts. The fitness of MT in  $HH$  and  $Hh$  hosts is  $(1 - m)$  while in  $hh$  hosts who are infected for the first time is  $(1 - m + s)$ . Subsequent MT infections of  $hh$  hosts result in lower viral fitness  $(1 - m + s(1 - c))$  due to compensatory immunity, which reduces the selective advantage by  $c$ . (B) Diagram illustrating the epidemiology of infections with WT ( $W$  shown in blue) and MT ( $M$  shown in red). Susceptible ( $S$ ) and immune ( $R$ ) hosts are indicated by  $S$  and  $R$ , respectively. The host genotype is indicated by the superscript  $j$  ( $h$  for  $hh$  and  $H$  for  $HH/Hh$ ), and the prior infection status is indicated by the subscript ( $W$  for WT and  $M$  for MT).

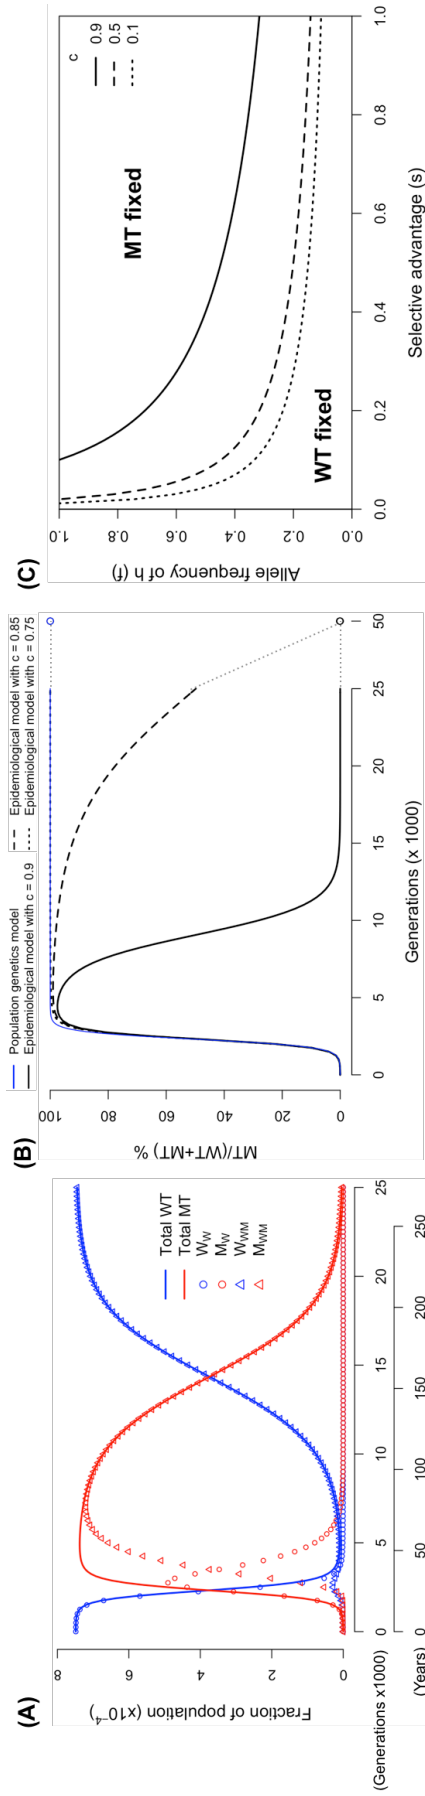

Figure 4: (A) The frequency of wild-type (WT) and escape-variant (MT) infections as a function of time. When CD8 T cell responses are compensated and thus decreases the selective advantage, the MT only invades transiently and goes extinct in the long run. ( $m = 0.001$ ,  $s = 0.05$ ,  $f^2 = 0.1$ ,  $c = 0.9$ ). (B) The MT prevalence predicted by epidemiological model with different degrees of compensation (black lines), compared to the population genetics model (blue line). In all scenarios, the initial invasions of the MT (before it reaches 50% prevalence) are similar. After it reaches 50%, if the degree of compensation is smaller than the threshold (in our parameter setting,  $c^* = 0.8$ . See Equation 2), the MT goes to fixation only slightly slower than what predicted by the population genetics model. In contrast, if the degree of compensation is higher than the threshold, the MT invades transiently and becomes extinct in the long run. (C) The parameter regimes of  $s$  and  $f$  where either MT or WT becomes fixed (and the other becomes extinct). We see that as the degree of compensation rises, the parameter regime where MT becomes fixed shrinks.

### 254 3 Discussion

255 We consider the question why CD8 T cell epitopes of human IAV are conserved. The  
256 answer to this question is relevant to the development of 'universal' CD8 T cell-inducing  
257 vaccines against influenza, and whether the virus is likely to evolve to escape the vaccine-  
258 induced immunity. Despite the wealth of empirical data showing conservation of CD8 T cell  
259 epitopes, the evolutionary mechanisms responsible for this conservation are not well known.  
260 One possibility that has been widely considered is that the nucleoprotein and matrix-1  
261 protein, which harbor the bulk of CD8 T cell epitopes, are under strong constraints (13,  
262 14). In this view, mutations in CD8 T cell epitopes would have a high fitness cost, or  
263 be relatively inaccessible due to epistatic changes needed for escape-variants to have high  
264 fitness. In this study, we proposed two other mechanisms that could impact the fitness  
265 of viruses that escape CD8 T cell recognition. The first one is that escape from CD8 T  
266 cell responses against a single epitope provides only a relatively small selective advantage  
267 to the escape-variant. The second one is that polymorphism in the MHC-I genes restricts  
268 this small advantage to only a small fraction (typically less than 10%) of individuals in the  
269 population – individuals with other alleles would not present this epitope but present other  
270 epitopes. We show that even if there is a minimal fitness cost to having a mutation in a  
271 CD8 T cell epitope, the latter two factors will result in a very low rate of invasion of the  
272 CD8 T cell escape-variant.

273 The conclusion of this study may seem to contradict the rapid invasion of the mutation  
274 at the 384-th amino-acid residue of the nucleoprotein. This mutation alters the NP<sub>383–391</sub>  
275 epitope presented by HLA-B\*27:05 and NP<sub>380–388</sub> epitope presented by HLA-B\*08:01. The  
276 wild-type sequence has an arginine (R), which forms an anchor residue at this site, and all  
277 16 viruses isolated and sequenced during the 1992-1993 epidemic season had the wild-type  
278 sequence (25). An arginine-to-glycine mutation at this site (R384G) abrogates the MHC-I  
279 binding and prevents antigen presentation, and this mutation rapidly swept through the  
280 population in the 1993-4 epidemic season, where all 56 virus isolates had G at this residue  
281 (25). Gog et al. (26) suggested that the rapid fixation of the R384G mutation was due  
282 to a combination of a longer duration of infection that slows its decline compared to the  
283 wild-type over the summer and stochastic events. We propose an alternative hypothesis –  
284 a selective advantage of the R384G mutation is not required and hitchhiking of a randomly  
285 generated mutant would be sufficient to explain the data. The rapid invasion of R384G  
286 temporally matches the transition from BE92 to WU95 antigenic clusters (27), suggesting  
287 that it could have hitchhiked with the antigenically drifted WU95 strain.

288 A recent analysis of the number of CD8 T cell epitopes in circulating strains of influenza  
289 showed that they gradually decline over a timescale of decades (28). For example, the  
290 H3N2 subtype had 84 experimentally-confirmed epitopes per virus in 1968, and this number  
291 declined to 64 in 2015. A decline in the number of epitopes could be partially due to the  
292 bias in identification of epitopes, as new epitopes may not be identified and included. The  
293 observed decline rather than drift in the number of confirmed epitopes may arise because of  
294 a slight selective advantage of the escape-variants over the wild-type. This study suggests  
295 that the gradual escape of the virus from a CD8 T cell vaccine may be possible.

296 We have intentionally used simple models – this is because the empirical data does not  
297 include accurate measurements of many of the key parameters that govern the generation  
298 and spread of virus escape-variants. In these circumstances the results of simpler models  
299 are typically more robust than those of complex models (29). This study identifies the  
300 importance of measuring parameters such as the fitness of the wild-type and escape-variants

301 in hosts, who have been previously infected with wild-type and both wild-type and escape-  
302 variants. Aspects that might be included in more refined models include: The waning of  
303 CD8 T cell immunity over time, particularly due to the loss of resident memory cells from  
304 the respiratory tract (30, 31), and the effect of stochasticity.

305 There are several differences in the ability of the influenza virus to evolve in response  
306 to antibody and CD8 T cell immunity. First, antibody immunity can generate sterilizing  
307 immunity (prevent infection with a matched virus strain) and thus generates substantial  
308 selection for antibody-escape-variants. In contrast, CD8 T cell immunity to influenza does  
309 not prevent infection and thus generates less selective advantage to a CD8 T cell-escape-  
310 variant. Second, an antibody-escape-variant will gain a selective advantage in the majority  
311 of individuals with antibodies to the wild-type strain while a CD8 T cell-escape-variant will  
312 have a selective advantage only in individuals of a particular MHC-I genotype. Both these  
313 factors contribute to antibody rather than CD8 T cell immunity driving antigenic drift in  
314 influenza.

315 Vaccination strategies that boost the CD8 T cell response may contribute to the de-  
316 velopment of broadly protective influenza vaccines. In this paper, we focus on whether  
317 these vaccine strategies will rapidly select for virus escape-variants at CD8 T cell epitopes,  
318 compromising the effectiveness of the vaccine. We show that this is unlikely to be the case.  
319 Although it is generally viewed as a potential limitation that these vaccines may not com-  
320 pletely prevent infection, this fact, together with MHC polymorphism, greatly reduces the  
321 selection pressure on the virus. Consequently, it may take a much longer duration for the  
322 virus to evolve and escape vaccine-induced CD8 T cell immunity.

323

324

(Word count: 3,645)

325 **Appendix**

326 **Population genetics model**

327 Equation 1 can be rearranged into

$$\frac{q_t}{1 - q_t} = K \left( \frac{q_{t-1}}{1 - q_{t-1}} \right) = K^t \left( \frac{q_0}{1 - q_0} \right)$$

328 We then express  $t$ , the number of generation required for the MT to reach  $q_t$ , by

$$t = \frac{1}{\log K} \left[ \log \left( \frac{q_t}{1 - q_t} \right) - \log \left( \frac{q_0}{1 - q_0} \right) \right]$$

329 The escape-variant can invade when  $K > 1$ , i.e.,

$$sf^2 + 2Rsf(1 - f) > m$$

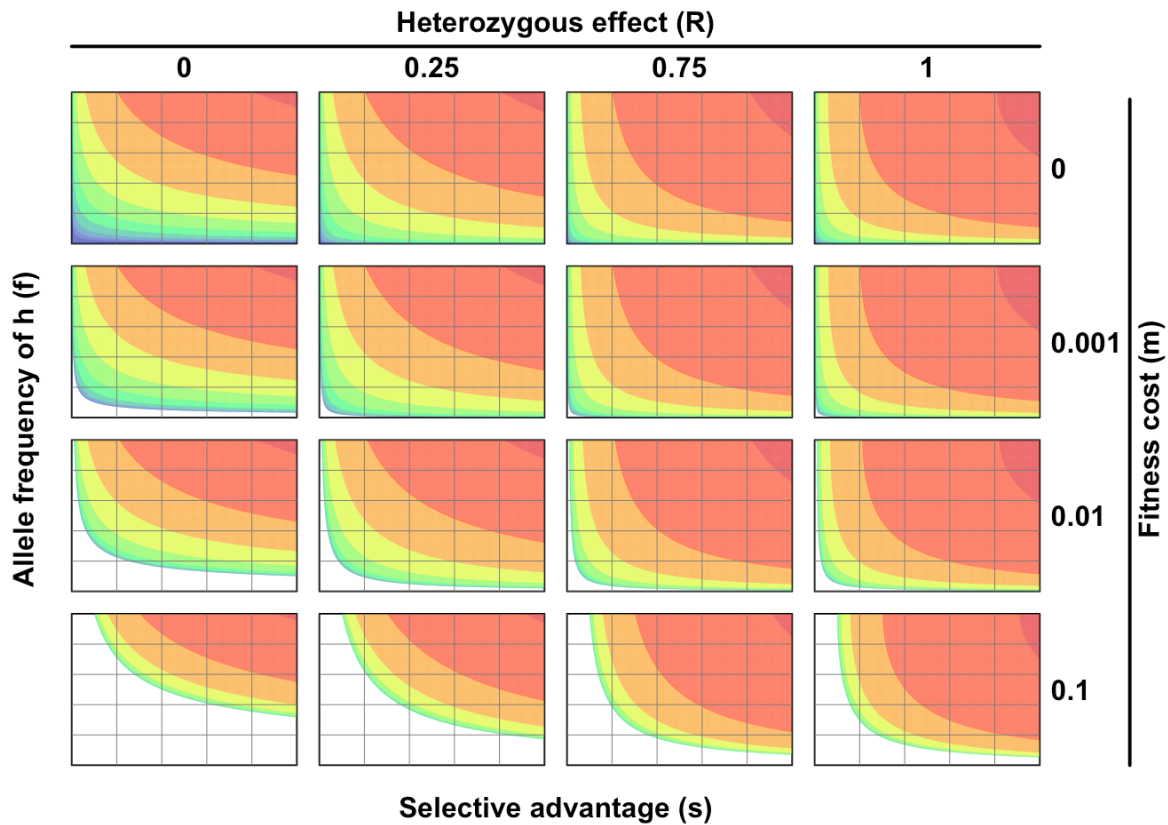

Figure 5: Rate of invasion of an escape-variant when the assumption of  $R = 0$  is relaxed.

## 331 Quantifying selection pressure on virus

332 We define three types of immunity effectiveness (IE) as follows:

- 333 •  $IE_S$  is the probability that an individual who have influenza-specific CD8 T cells does  
334 not get infected upon a contact with an infectious individual
- 335 •  $IE_P$  is the probability that an infected who have influenza-specific CD8 T cells does  
336 not develop symptoms.
- 337 •  $IE_I$  as the probability that an infected who have influenza-specific CD8 T cells does  
338 not spread the virus.

339 The selection pressure on virus ( $\mathcal{S}$ ) is formulated by

$$1 - \mathcal{S} = (1 - IE_S)(1 - IE_I)$$

340 The viral fitness after selection,  $1 - \mathcal{S}$ , is the probability of transmission within the host  
341 population who have influenza-specific CD8 T cells, and can be expressed as the probability  
342 that an immune individual gets infected ( $1 - IE_S$ ) and spreads the virus ( $1 - IE_I$ ).

## 343 Map of CD8 T cell epitope on influenza nucleoprotein

344 Epitope dataset was retrieved from Immune Epitope Database ([www.iedb.org](http://www.iedb.org)). We searched  
345 for MHC class I-restricted linear epitope of influenza A virus (ID: 11320, FLUAV) in humans  
346 with at least one positive T cell assay. We retrieved 1,220 records from IEDB, of which  
347 514 were derived from NP. After excluding the records longer than 12 amino-acid residues  
348 or with no HLA allele information available, records with the same amino-acid sequence,  
349 with different sequences but at the same location of NP and presented by the same HLA  
350 allele, or nested under a longer record, were combined into one 'unique' epitope. In total,  
351 64 unique epitopes were identified. Escaping mutations were identified from the literatures  
352 (9, 12).

353 HLA allele dataset reported by National Marrow Donor Program (NMDP) was retrieved  
354 from The Allele Frequency Net Database ([www.allelefrequencies.net](http://www.allelefrequencies.net)). We included all the  
355 alleles that have been reported to present at least one epitope in the epitope dataset, and  
356 calculated the average frequency weighted by sample sizes. In addition, since the alleles in  
357 one HLA supertype prefer amino acid with similar chemical property at certain residues of  
358 the epitopes, we grouped the HLA alleles based on the classification proposed by Sette et  
359 al. (32).

360 With the epitope and HLA allele datasets, we estimate the fraction of host population  
361 affected on each amino-acid residue given that there is an escaping mutation, assuming  
362 (1) the escaping effect is recessive and (2) the alleles of one locus are under HWE. For  
363 a particular residue included in a number of epitopes, we denote the collection of unique  
364 alleles that can present these epitopes,  $\{h_1, h_2, \dots, h_m\}$ , by  $h$ . The mutant is able to escape  
365 only from the hosts carrying both alleles from  $h$ , and the estimated probability of escape is  
366 given by

$$\text{Estimated probability of escape} = \text{Freq}(h)^2 = \left( \sum_{i=1}^m \text{Freq}(h_i) \right)^2$$

367 For example, the T147 residue is included in three epitopes: NP140-148 (bound by A\*01:01,  
368 A\*26:01, and A\*30:02), NP140-150 (bound by B\*15:01), and NP145-156 (bound by A\*68:01).

369 Suppose an escaping mutation on T147 results in escape from all of the alleles, the estimated  
 370 probability of this mutant escaping from a host is

$$(0.11 + 0.029 + 0.021 + 0.036)^2 \approx 0.038 \quad (\text{HLA-A})$$

371

$$0.04^2 = 0.0016 \quad (\text{HLA-B})$$

372 Although the Assumption (1) has not been tested in the context of influenza infection,  
 373 studies on the genetic factors of autoimmune diseases may provide indirect support. Risk  
 374 alleles associated with multiple sclerosis and type 1 diabetes mellitus have dominant genetic  
 375 predisposition to the diseases (16, 17). It implies that one allele is enough to present antigen  
 376 and activate autoreactive CD4 T cell; conversely, it implies that it is not enough for a virus  
 377 to escape from detection if only one allele is escaped.

### 378 ODE system and the equilibrium

$$\begin{aligned} \frac{dS_W^j}{dt} &= \omega R_W^j - S_W^j \sum_{j=H,h} \left( \beta_W^j W_W^j + \mu_W^j M_W^j + \beta_{WM}^j W_{WM}^j + \mu_{WM}^j M_{WM}^j \right) \\ \frac{dS_{WM}^j}{dt} &= \omega R_{WM}^j - S_{WM}^j \sum_{j=H,h} \left( \beta_W^j W_W^j + \mu_W^j M_W^j + \beta_{WM}^j W_{WM}^j + \mu_{WM}^j M_{WM}^j \right) \\ \frac{dW_W^j}{dt} &= S_W^j \sum_{j=H,h} \left( \beta_W^j W_W^j + \beta_{WM}^j W_{WM}^j \right) - \gamma W_W^j \\ \frac{dM_W^j}{dt} &= S_W^j \sum_{j=H,h} \left( \mu_W^j M_W^j + \mu_{WM}^j M_{WM}^j \right) - \gamma M_W^j \\ \frac{dW_{WM}^j}{dt} &= S_{WM}^j \sum_{j=H,h} \left( \beta_W^j W_W^j + \beta_{WM}^j W_{WM}^j \right) - \gamma W_{WM}^j \\ \frac{dM_{WM}^j}{dt} &= S_{WM}^j \sum_{j=H,h} \left( \mu_W^j M_W^j + \mu_{WM}^j M_{WM}^j \right) - \gamma M_{WM}^j \\ \frac{dR_W^j}{dt} &= \gamma W_W^j - \omega R_W^j \\ \frac{dR_{WM}^j}{dt} &= \gamma (M_W^j + W_{WM}^j + M_{WM}^j) - \omega R_{WM}^j \end{aligned}$$

379 where  $j = h$  denotes the genotype of  $hh$  and  $j = H$  denotes the genotypes of  $HH$  and  $Hh$ .  
 380 We started simulations from the equilibrium of WT infection, i.e.,

$$\begin{aligned} *S_W^H &= \frac{\gamma}{\beta} (1 - f^2), & *I_W^H &= \frac{\omega}{\omega + \gamma} \left( 1 - \frac{\gamma}{\beta} \right) (1 - f^2), & *R_W^H &= \frac{\gamma}{\omega + \gamma} \left( 1 - \frac{\gamma}{\beta} \right) (1 - f^2) \\ *S_W^h &= \frac{\gamma}{\beta} f^2, & *I_W^h &= \frac{\omega}{\omega + \gamma} \left( 1 - \frac{\gamma}{\beta} \right) f^2, & *R_W^h &= \frac{\gamma}{\omega + \gamma} \left( 1 - \frac{\gamma}{\beta} \right) f^2 \end{aligned}$$

381 where  $\beta = \beta_W^H = \beta_W^h$ . Values of parameters are listed in Table 1.

Table 1: Model parameters

| Parameter                                                       | Symbol      | Value              |
|-----------------------------------------------------------------|-------------|--------------------|
| Transmission rate of $W_W^H$ ( $\text{day}^{-1}$ ) <sup>†</sup> | $\beta_W^H$ | 0.4                |
| Recovery rate ( $\text{day}^{-1}$ )                             | $\gamma$    | 0.25               |
| Drifting rate ( $\text{day}^{-1}$ )                             | $\omega$    | $5 \times 10^{-4}$ |

<sup>†</sup>See Table 2 for the setup of other transmission parameters.

Table 2: Transmissibility according to genotypes and immune status

| Compartment | Symbol         | Value                         |
|-------------|----------------|-------------------------------|
| $M_W^H$     | $\mu_W^H$      | $\beta_W^H(1 - m)$            |
| $W_W^h$     | $\beta_W^h$    | $\beta_W^H$                   |
| $M_W^h$     | $\mu_W^h$      | $\beta_W^H(1 - m + s)$        |
| $W_{WM}^H$  | $\beta_{WM}^H$ | $\beta_W^H$                   |
| $M_{WM}^H$  | $\mu_{WM}^H$   | $\beta_W^H(1 - m)$            |
| $W_{WM}^h$  | $\beta_{WM}^h$ | $\beta_W^H$                   |
| $M_{WM}^h$  | $\mu_{WM}^h$   | $\beta_W^H(1 - m + (1 - c)s)$ |

## References

382

- 383 1. Iuliano AD, Roguski KM, Chang HH, Muscatello DJ, Palekar R, Tempia S, Co-  
384 hen C, Gran JM, Schanzer D, Cowling BJ, Wu P, Kyncl J, Ang LW, Park M,  
385 Redlberger-Fritz M, Yu H, Espenhain L, Krishnan A, Emukule G, van Asten L, da  
386 Silva SP, Aungkulanon S, Buchholz U, Widdowson M-A, Bresee JS, and the Global  
387 Seasonal Influenza-associated Mortality Collaborator Network. 2017. Estimates of  
388 global seasonal influenza-associated respiratory mortality: A modelling study. *Lancet*  
389 391(10127):1285–1300.
- 390 2. Hensley SE, Das SR, Bailey AL, Schmidt LM, Hickman HD, Jayaraman A, Viswanathan  
391 K, Raman R, Sasisekharan R, Bennink JR, and Yewdell JW. 2009. Hemagglutinin re-  
392 ceptor binding avidity drives influenza A virus antigenic drift. *Science* 326(5953):734–  
393 736.
- 394 3. Soema PC, Kompier R, Amorij JP, and Kersten GF. 2015. Current and next generation  
395 influenza vaccines: Formulation and production strategies. *Eur J Pharm Biopharm*  
396 94:251–263.
- 397 4. Krammer F and Palese P. Advances in the development of influenza virus vaccines.  
398 2015. *Nat Rev Drug Discov* 14(3):167–182.
- 399 5. Clemens E, van de Sandt C, Wong S, Wakim L, and Valkenburg S. 2018. Harnessing  
400 the power of T cells: The promising hope for a universal influenza vaccine. *Vaccines*  
401 (Basel) 6(2):18.
- 402 6. McMichael AJ, Gotch FM, Noble GR, and Beare PA. 1983. Cytotoxic T-cell immunity  
403 to influenza. *N Engl J Med* 309(1):13–17.



- 404 7. Sridhar S, Begom S, Bermingham A, Hoschler K, Adamson W, Carman W, Bean T,  
405 Barclay W, Deeks JJ, and Lalvani A. 2013. Cellular immune correlates of protection  
406 against symptomatic pandemic influenza. *Nat Med* 19(10):1305–1312.
- 407 8. Liang S, Mozdzanowska K, Palladino G, and Gerhard W. 1994. Heterosubtypic im-  
408 munity to influenza type A virus in mice. Effector mechanisms and their longevity. *J*  
409 *Immunol* 152:1653–1661.
- 410 9. Quiñones-Parra S, Grant E, Loh L, Nguyen THO, Campbell K-A, Tong SYC, Miller A,  
411 Doherty PC, Vijaykrishna D, Rossjohn J, Gras S, and Kedzierska K. 2014. Preexisting  
412 CD8+ T-cell immunity to the H7N9 influenza A virus varies across ethnicities. *Proc*  
413 *Natl Acad Sci U S A* 111(3):1049–1054.
- 414 10. Bhatt S, Holmes EC, and Pybus OG. 2011. The genomic rate of molecular adaptation  
415 of the human influenza A virus. *Mol Biol Evol* 28(9):2443–2451.
- 416 11. Machkovech HM, Bedford T, Suchard MA, and Bloom JD. 2015. Positive selection  
417 in CD8+ T-cell epitopes of influenza virus nucleoprotein revealed by a comparative  
418 analysis of human and swine viral lineages. *J Virol* 89(22):11275–11283.
- 419 12. Rimmelzwaan GF, Kreijtz JHCM, Bodewes R, Fouchier RAM, and Osterhaus ADME.  
420 2009. Influenza virus CTL epitopes, remarkably conserved and remarkably variable.  
421 *Vaccine* 27(45):6363–6365.
- 422 13. Berkhoff EGM, de Wit E, Geelhoed-Mieras MM, Boon ACM, Symons J, Fouchier  
423 RAM, Osterhaus ADME, and Rimmelzwaan GF. 2005. Functional constraints  
424 of influenza A virus epitopes limit escape from cytotoxic T lymphocytes. *J Virol*  
425 79(17):11239–11246.
- 426 14. Berkhoff EGM, de Wit E, Geelhoed-Mieras MM, Boon ACM, Symons J, Fouchier  
427 RAM, Osterhaus ADME, and Rimmelzwaan GF. 2006. Fitness costs limit escape  
428 from cytotoxic T lymphocytes by influenza A viruses. *Vaccine* 24(44-46):6594–6596.
- 429 15. Gong LI, Suchard MA, and Bloom JD. 14 May 2013, posting date. Stability-mediated  
430 epistasis constrains the evolution of an influenza protein. *Elife* 2:e00631. doi: 10.7554/eLife.00631.  
431
- 432 16. Simmonds M and Gough S. 2007. The HLA region and autoimmune disease: Associ-  
433 ations and mechanisms of action. *Curr Genomics* 8(7):453–465.
- 434 17. Cruz-Tapias P, Castiblanco J, and Anaya J-M. 2013. HLA association with autoim-  
435 mune diseases, pp. 271–284. *In* Anaya JM, Shoenfeld Y, Rojas-Villarraga A, Levy  
436 RA, Cervera R (ed.), *Autoimmunity: From Bench to Bedside*. El Rosario University  
437 Press, Bogota (Columbia).
- 438 18. Cowling BJ, Fang VJ, Riley S, Peiris JSM, and Leung GM. 2009. Estimation of the  
439 serial interval of influenza. *Epidemiology* 20(3):344–347.
- 440 19. Halloran ME, Struchiner CJ, and Longini IM. 1997. Study designs for evaluating  
441 different efficacy and effectiveness aspects of vaccines. *Am J Epidemiol* 146(10):789–  
442 803.

- 443 20. O'Neill E, Krauss SL, Riberdy JM, Webster RG, and Woodland DL. 2000. Heterolo-  
444 gous protection against lethal A/HongKong/156/97 (H5N1) influenza virus infection  
445 in C57BL/6 mice. *J Gen Virol* 81(Pt 11):2689–2696.
- 446 21. Kreijtz JHCM, Bodewes R, van den Brand JMA, de Mutsert G, Baas C, van Ameron-  
447 gen G, Fouchier RAM, Osterhaus ADME, and Rimmelzwaan GF. 2009. Infection of  
448 mice with a human influenza A/H3N2 virus induces protective immunity against lethal  
449 infection with influenza A/H5N1 virus. *Vaccine* 27(36):4983–4989.
- 450 22. McMaster SR, Gabbard JD, Koutsonanos DG, Compans RW, Tripp RA, Tompkins  
451 SM, and Kohlmeier JE. 11 Feb 2015, posting date. Memory T cells generated by prior  
452 exposure to influenza cross react with the novel H7N9 influenza virus and confer pro-  
453 tective heterosubtypic immunity. *PLoS One* 10(2):e0115725. doi:10.1371/journal.pone.0115725.  
454
- 455 23. Kucharski AJ, Lessler J, Read JM, Zhu H, Jiang CQ, Guan Y, Cummings DAT, and  
456 Riley S. 2015. 3 Mar 2015, posting date. Estimating the life course of influenza  
457 A(H3N2) antibody responses from cross-sectional data. *PLoS Biol* 13(3):e1002082.  
458 doi: 10.1371/journal.pbio.1002082.
- 459 24. Pease CM. An evolutionary epidemiological mechanism, with applications to type A  
460 influenza. 1987. *Theor Popul Biol*, 31(3):422–452.
- 461 25. Voeten JTM, Bestebroer TM, Nieuwkoop NJ, Fouchier RAM, Osterhaus ADME, and  
462 Rimmelzwaan GF. 2000. Antigenic drift in the influenza A virus (H3N2) nucleoprotein  
463 and escape from recognition by cytotoxic T lymphocytes. *J Virol* 74(15):6800–6807.
- 464 26. Gog JR, Rimmelzwaan GF, Osterhaus ADME, and Grenfell BT. Population dynamics  
465 of rapid fixation in cytotoxic T lymphocyte escape mutants of influenza A. 2003. *Proc*  
466 *Natl Acad Sci U S A* 100(19):11143–11147.
- 467 27. Smith DJ, Lapedes AS, de Jong JC, Bestebroer TM, Rimmelzwaan GF, Osterhaus  
468 ADME, and Fouchier RAM. 2004. Mapping the antigenic and genetic evolution of  
469 influenza virus. *Science* 305(5682):371–376.
- 470 28. Woolthuis RG, van Dorp CH, Kesmir C, de Boer RJ, and van Boven M. 2016. Long-  
471 term adaptation of the influenza A virus by escaping cytotoxic T-cell recognition. *Sci*  
472 *Rep* 6:33334.
- 473 29. Hilborn R and Mangel M. 1997. *The ecological detective: Confronting models with*  
474 *data*. Princeton University Press, Princeton.
- 475 30. Wu T, Hu T, Lee Y-T, Bouchard KR, Benechet A, Khanna K, and Cauley LS.  
476 2014. Lung-resident memory CD8 T cells (TRM) are indispensable for optimal cross-  
477 protection against pulmonary virus infection. *J Leukoc Biol* 95(2):215–224.
- 478 31. Zarnitsyna VI, Handel A, McMaster SR, Hayward SL, Kohlmeier JE, and Antia R.  
479 9 May 2016, posting date. Mathematical model reveals the role of memory CD8  
480 T cell populations in recall responses to influenza. *Front Immunol*, 7:165. doi:  
481 10.3389/fimmu.2016.00165.
- 482 32. Sidney J, Peters B, Frahm N, Brander C, and Sette A. 2008. HLA class I supertypes:  
483 A revised and updated classification. *BMC Immunol* 9:1.
